# Supplementary material for: Nipah Virus Infection Generates Ordered Structures in Cellulo
Source: MDPI journal article supplement (doi:10.3390/v14071523), 2022-07-12
Supplement: s1 [file s1]

Archive with 4 entries (4 files):
- NiV M movie HR.mov
- NiV N movie 3D.mp4
- NiV P protein movie 3D.mov
- viruses-1685518-supplementary.pdf
