# Supplementary material for: Nipah Virus Infection Generates Ordered Structures in Cellulo
Source: MDPI journal article supplement (doi:10.3390/v14071523), 2022-07-12
Supplement: s1 [file s1]

## Supplementary Figures

Figure S1

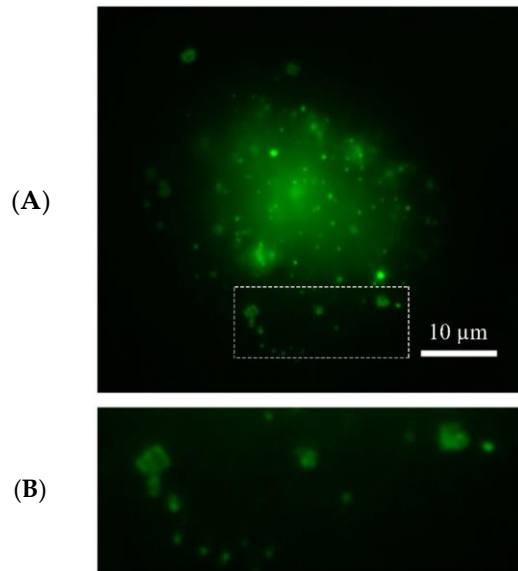

**Figure S1. Incipient ordered structures in Huh-7.5 cells.** (A) NiV N stain (in green) in NiV infected cells at 8h p.i. Scale bar: 10 μm (B) Detail of the early NiV ordered structures present in the dotted rectangle

Figure S2

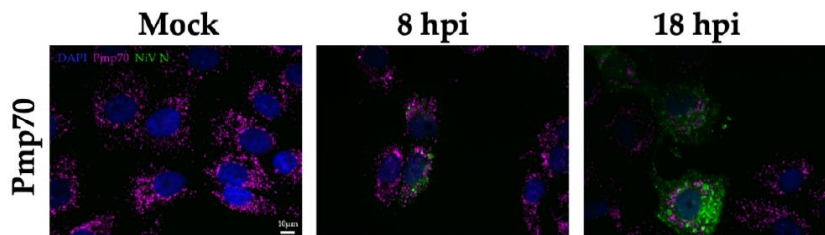

**Figure S2. Localization of NiV N and peroxisomes.** Vero E6 cells were fixed at 8-, and 18- h p.i. and localization of peroxisomes (in magenta, Pmp70) and NiV nucleoprotein N (green), were shown. Cellular nuclei were stained with DAPI (blue). Scale 10 μm.

**Figure S3**

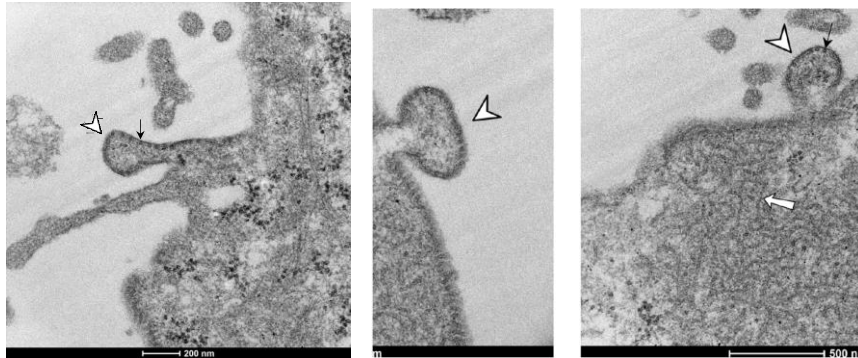

**Figure S3. Electron micrographs of NiV infected cells.** NiV particles budding (white arrow heads) and RNCs in longitudinal (white thick arrow) and cross-section (black thin arrow).

**Figure S4**

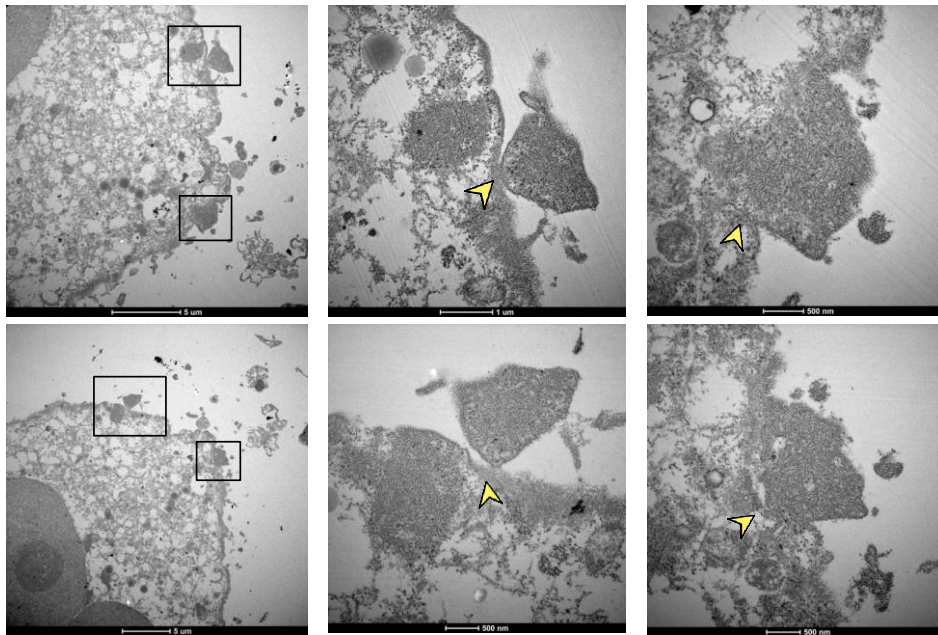

**Figure S4. Transmission electron micrographs of NiV infected cells containing ordered structures.** TEM-overview of a NiV-infected Vero E6 cell with magnified areas (in black squares) with ordered structures (yellow arrow heads).

Table S1

Table 1. Amino acid analysis of NiV N, NiV M, EBOV NP and JUNV NP.

| Amino acid (aa)             | NiV N      | NiV M      | EBOV NP    | JUNV NP    |
|-----------------------------|------------|------------|------------|------------|
|                             | Percentage | Percentage | Percentage | Percentage |
| Ala (A) *                   | 10.9       | 4.3        | 7.2        | 5.1        |
| Arg (R)                     | 7.1        | 6.0        | 4.5        | 6.0        |
| Asn (N)                     | 3.8        | 5.4        | 4.5        | 4.6        |
| Asp (D)                     | 4.9        | 5.4        | 8.0        | 6.7        |
| Cys (C)                     | 0.0        | 1.7        | 0.4        | 1.2        |
| Gln (Q)                     | 4.1        | 2.6        | 7.2        | 5.5        |
| Glu (E)                     | 7.3        | 4.8        | 8.0        | 5.5        |
| Gly (G) *                   | 7.0        | 7.4        | 5.6        | 7.3        |
| His (H)                     | 0.4        | 1.7        | 4.1        | 1.8        |
| Ile (I) *                   | 6.0        | 8.2        | 3.9        | 4.8        |
| Leu (L) *                   | 8.6        | 9.4        | 9.1        | 11.5       |
| Lys (K)                     | 4.5        | 7.7        | 5.1        | 7.4        |
| Met (M) *                   | 3.4        | 3.4        | 2.6        | 2.5        |
| Phe (F) *                   | 3.6        | 4.8        | 3.5        | 3.0        |
| Pro (P) *                   | 3.8        | 4.0        | 5.7        | 4.6        |
| Ser (S)                     | 9.8        | 8.8        | 6.5        | 7.3        |
| Thr (T)                     | 6.2        | 3.4        | 5.1        | 5.1        |
| Trp (W) *                   | 0.9        | 1.1        | 0.5        | 1.1        |
| Tyr (Y)                     | 2.1        | 4.0        | 2.8        | 2.3        |
| Val (V) *                   | 5.6        | 6.0        | 5.7        | 6.6        |
| Pyl (O)                     | 0.0        | 0.0        | 0.0        | 0.0        |
| Sec (U)                     | 0.0        | 0.0        | 0.0        | 0.0        |
| Hydrophobic aa %            | 49.8       | 48,6       | 43,8       | 46,5       |
| Predicted scaled solubility | 0.349      | 0.362      | 0.544      | 0.415      |

\* Hydrophobic amino acids.

**Video S1**

**NiV N**

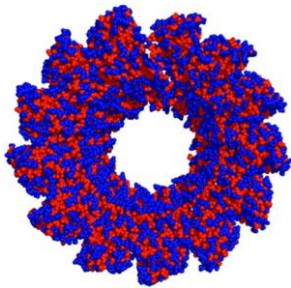

**NiV M**

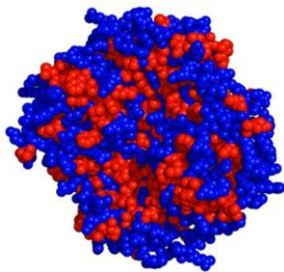

**NiV P**

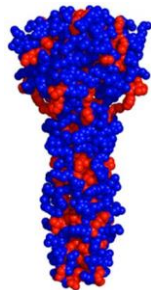

**Video S1. Three-dimensional rotation view of NiV N, M and P proteins.** Hydrophobic amino acids are red and non-hydrophobic amino acids are displayed in blue. Movies were generated with Pymol software.
